# Supplementary material for: Dispersion stability, magnetivity and wettability of cellulose nanocrystal (CNC)-dispersed superparamagnetic Fe3O4 nanoparticles: impact of CNC concentration
Source: Royal Society of Chemistry journal article supplement (doi:10.1039/c6ra16109j), 2016-01-01
Supplement: c6ra16109j1.pdf [file c6ra16109j1.pdf]

†Supporting Information

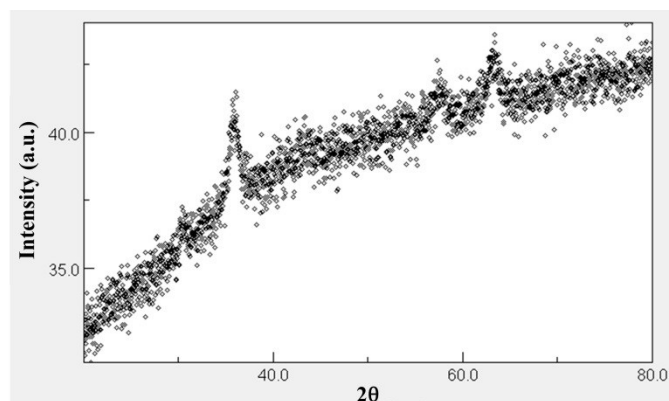

Fig. S.1. XRD pattern of MCNC0.05 composites.

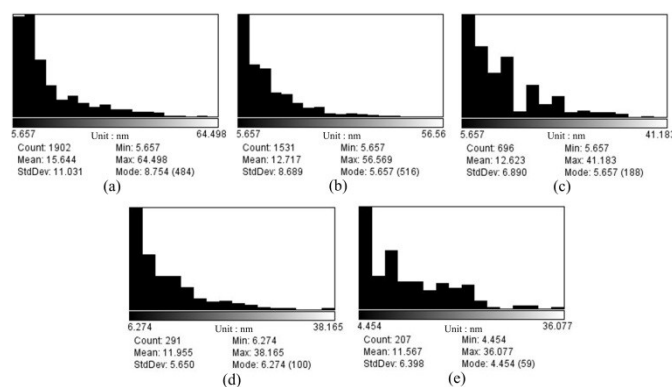

Fig. S.2. Histogram of MNPs for all MCNC samples obtained from ImageJ analysis. (a) MCNC0.01, (b) MCNC0.05, (c) MCNC0.1, (d) MCNC0.05, (e) MCNC0.01.

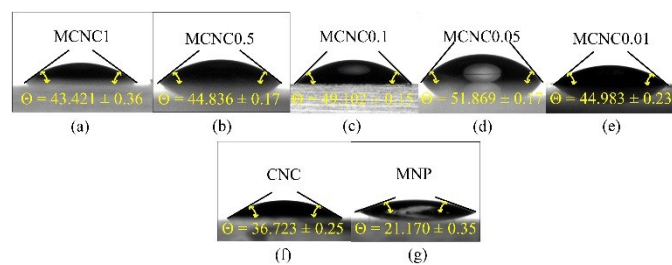

MCNC0.5, (e) MCNC1.

Fig. S.3. Contact angle of water droplet on the surface of a thin film of (a) MCNC1, (b) MCNC0.5, (c) MCNC0.1, (d) MCNC0.05, (e) MCNC0.01, (f) CNC, and (g) MNP.
